# Supplementary material for: Synthesis, Complexation Properties, and Evaluation of New Aminodiphosphonic Acids as Vector Molecules for 68Ga Radiopharmaceuticals
Source: MDPI journal article supplement (doi:10.3390/molecules26082357), 2021-04-18
Supplement: s1 [file s1]

## Supplementary materials

### Synthesis, Complexation Properties, and Evaluation of New Aminodiphosphonic Acids as Vector Molecules for $^{68}\text{Ga}$ Radiopharmaceuticals

Alesya Ya. Maruk<sup>1</sup>, Valery V. Ragulin<sup>2</sup>, Iurii A. Mitrofanov<sup>1</sup>, Galina S. Tsebrikova<sup>3,\*</sup>, Vitaly P. Solov'ev<sup>3</sup>, Alexandr S. Lunev<sup>1</sup>, Kristina A. Lunyova<sup>1</sup>, Olga E. Klementyeva<sup>1</sup>, Vladimir E. Baulin<sup>2</sup>, Galina E. Kodina<sup>1</sup>, and Aslan Yu. Tsivadse<sup>3</sup>

<sup>1</sup>*Department of Radiation Medical Technologies, State Research Center – Burnasyan Federal Medical Biophysical Center of Federal Medical Biological Agency, Moscow, Russian Federation*

<sup>2</sup>*Laboratory of Organophosphorus Compounds, Institute of Physiologically Active Compounds, Russian Academy of Sciences, Chernogolovka, Russian Federation*

<sup>3</sup>*Laboratory of Novel Physicochemical Problems, Frumkin Institute of Physical Chemistry and Electrochemistry, Russian Academy of Sciences, Moscow, Russian Federation*

| Contents                                                                                             | Page |
|------------------------------------------------------------------------------------------------------|------|
| Figure S1 $^1\text{H}$ and $^{13}\text{C}$ NMR of nitrile <b>6a</b>                                  | 2    |
| Figure S2 $^1\text{H}$ , $^{13}\text{C}$ and $^{31}\text{P}$ NMR of nitrile <b>6b</b>                | 3    |
| Figure S3 $^1\text{H}$ , $^{13}\text{C}$ and $^{31}\text{P}$ NMR of aminodiphosphonic acid <b>7a</b> | 4    |
| Figure S4a $^1\text{H}$ NMR of aminodiphosphonic acid <b>7b</b>                                      | 5    |
| Figure S4b $^{13}\text{C}$ and $^{31}\text{P}$ NMR of aminodiphosphonic acid <b>7b</b>               | 6    |
| Figure S5 $^1\text{H}$ , $^{13}\text{C}$ and $^{31}\text{P}$ NMR of aminodiphosphonic acid <b>8</b>  | 7    |
| Figure S6 $^1\text{H}$ , $^{13}\text{C}$ and $^{31}\text{P}$ NMR of aminodiphosphonic acid <b>9</b>  | 8    |
| Table S1    Protonation constants of acids <b>8</b> and <b>9</b>                                     | 9    |
| Table S2    Full stability constants of the $\text{Ga}^{3+}$ complexes with <b>8</b> and <b>9</b>    | 9    |

**Figure S1.**  $^1\text{H}$  and  $^{13}\text{C}$  NMR of nitrile **6a**.

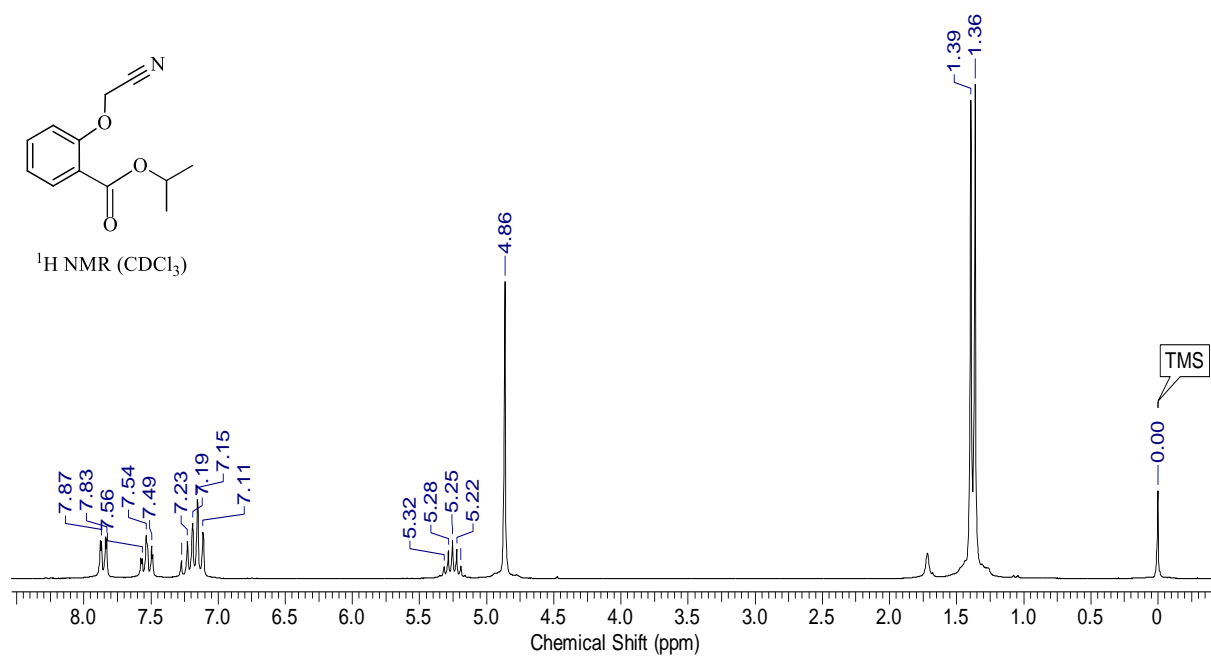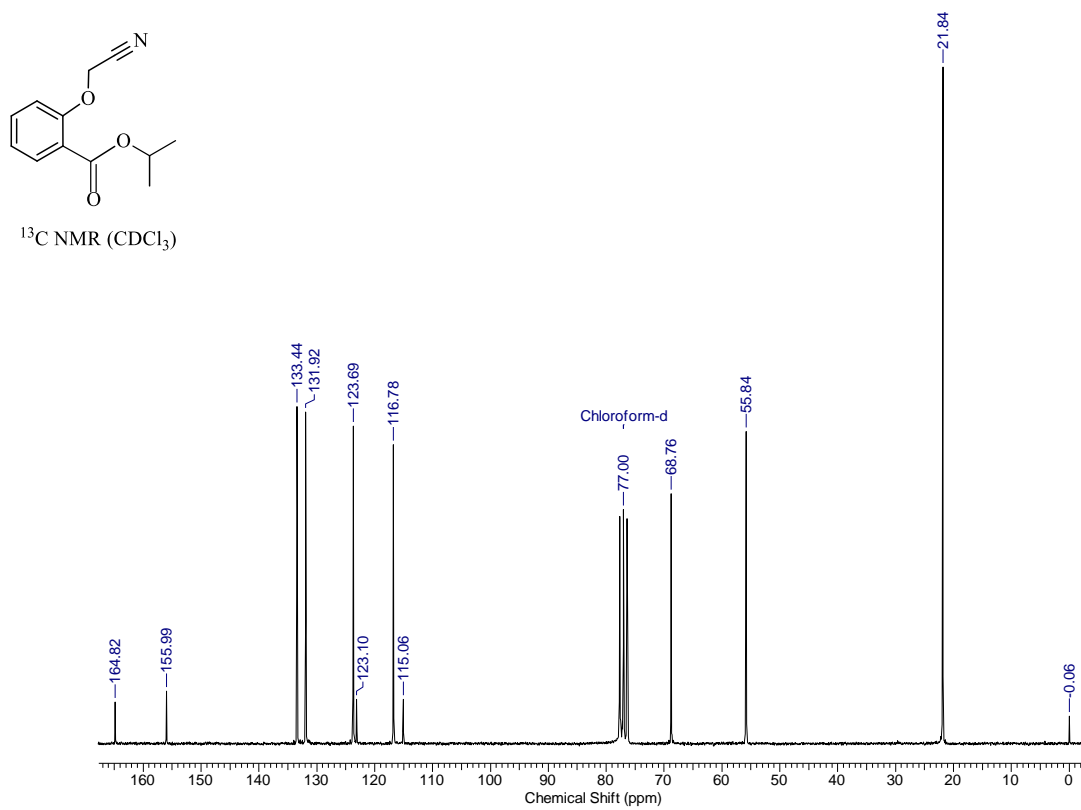

**Figure S2.**  $^1\text{H}$ ,  $^{13}\text{C}$  and  $^{31}\text{P}$  NMR of nitrile **6b**.

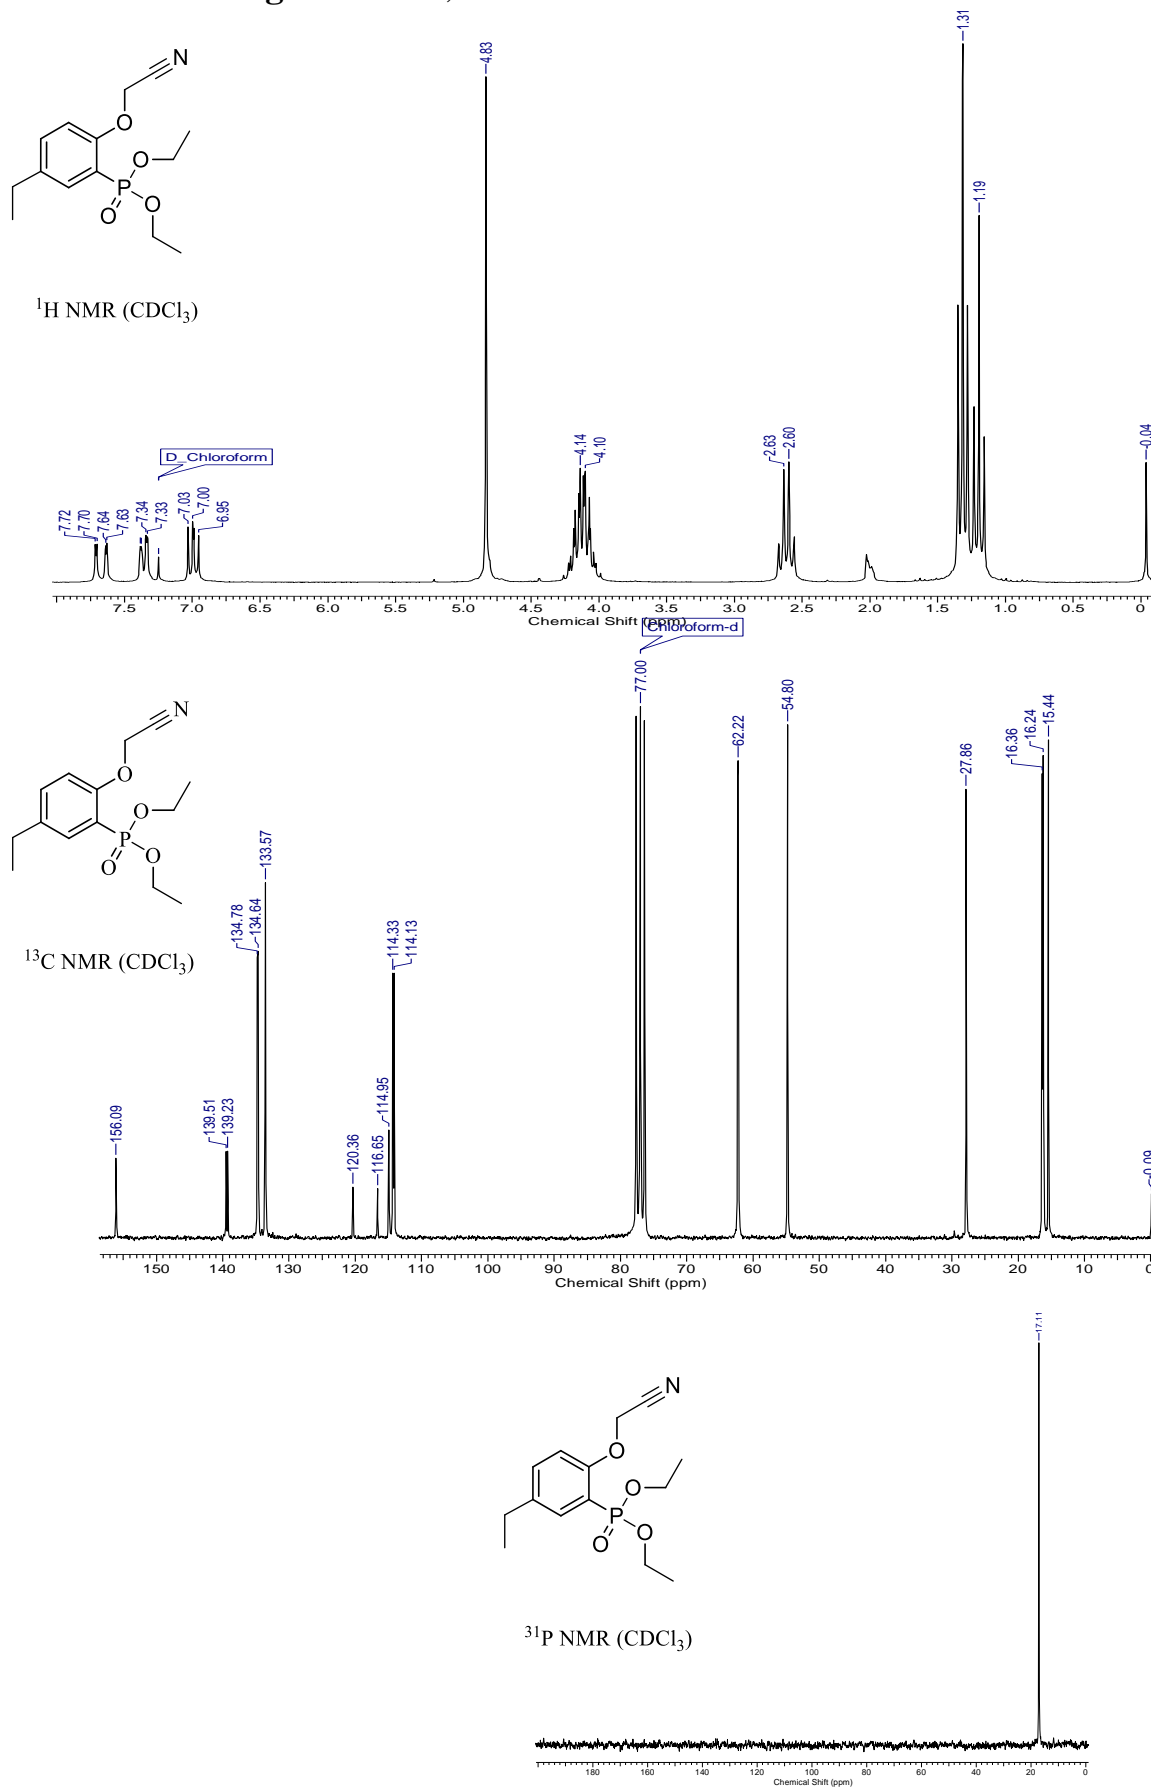

**Figure S3.**  $^1\text{H}$ ,  $^{13}\text{C}$  and  $^{31}\text{P}$  NMR of aminodiphosphonic acid **7a**.

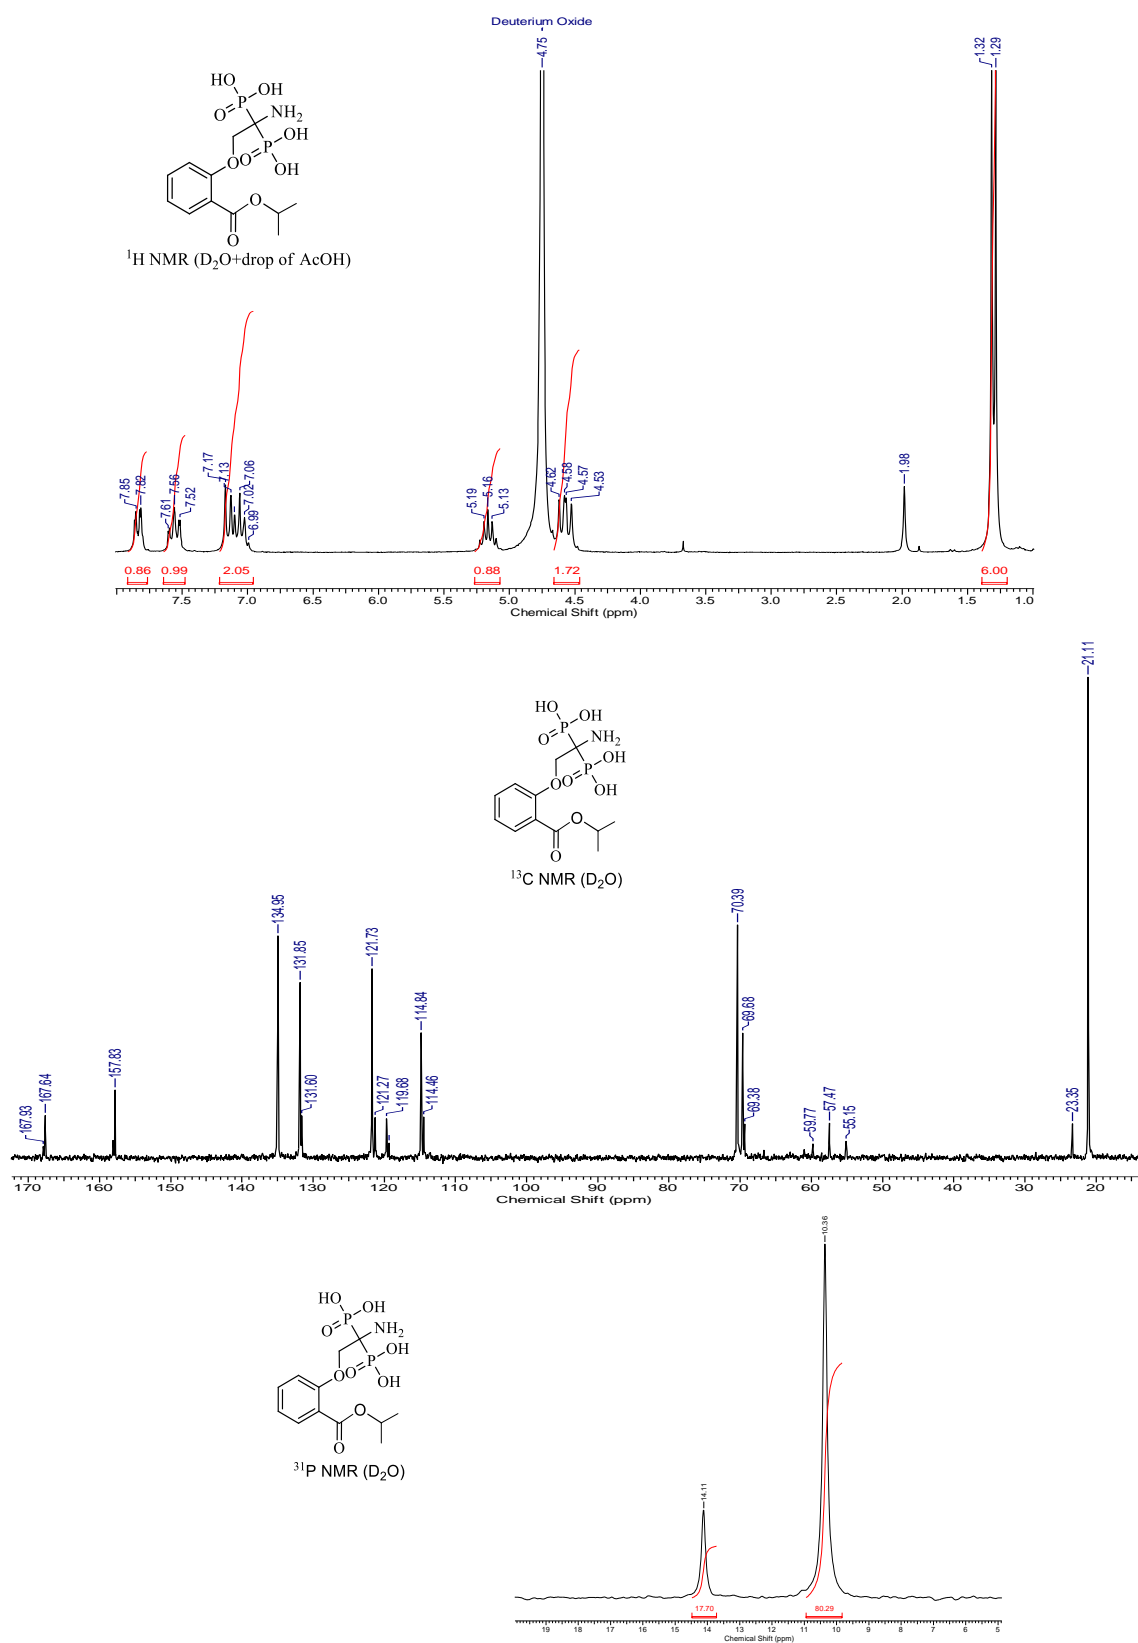

**Figure S4a.**  $^1\text{H}$  NMR of aminodiphosphonic acid **7b**.

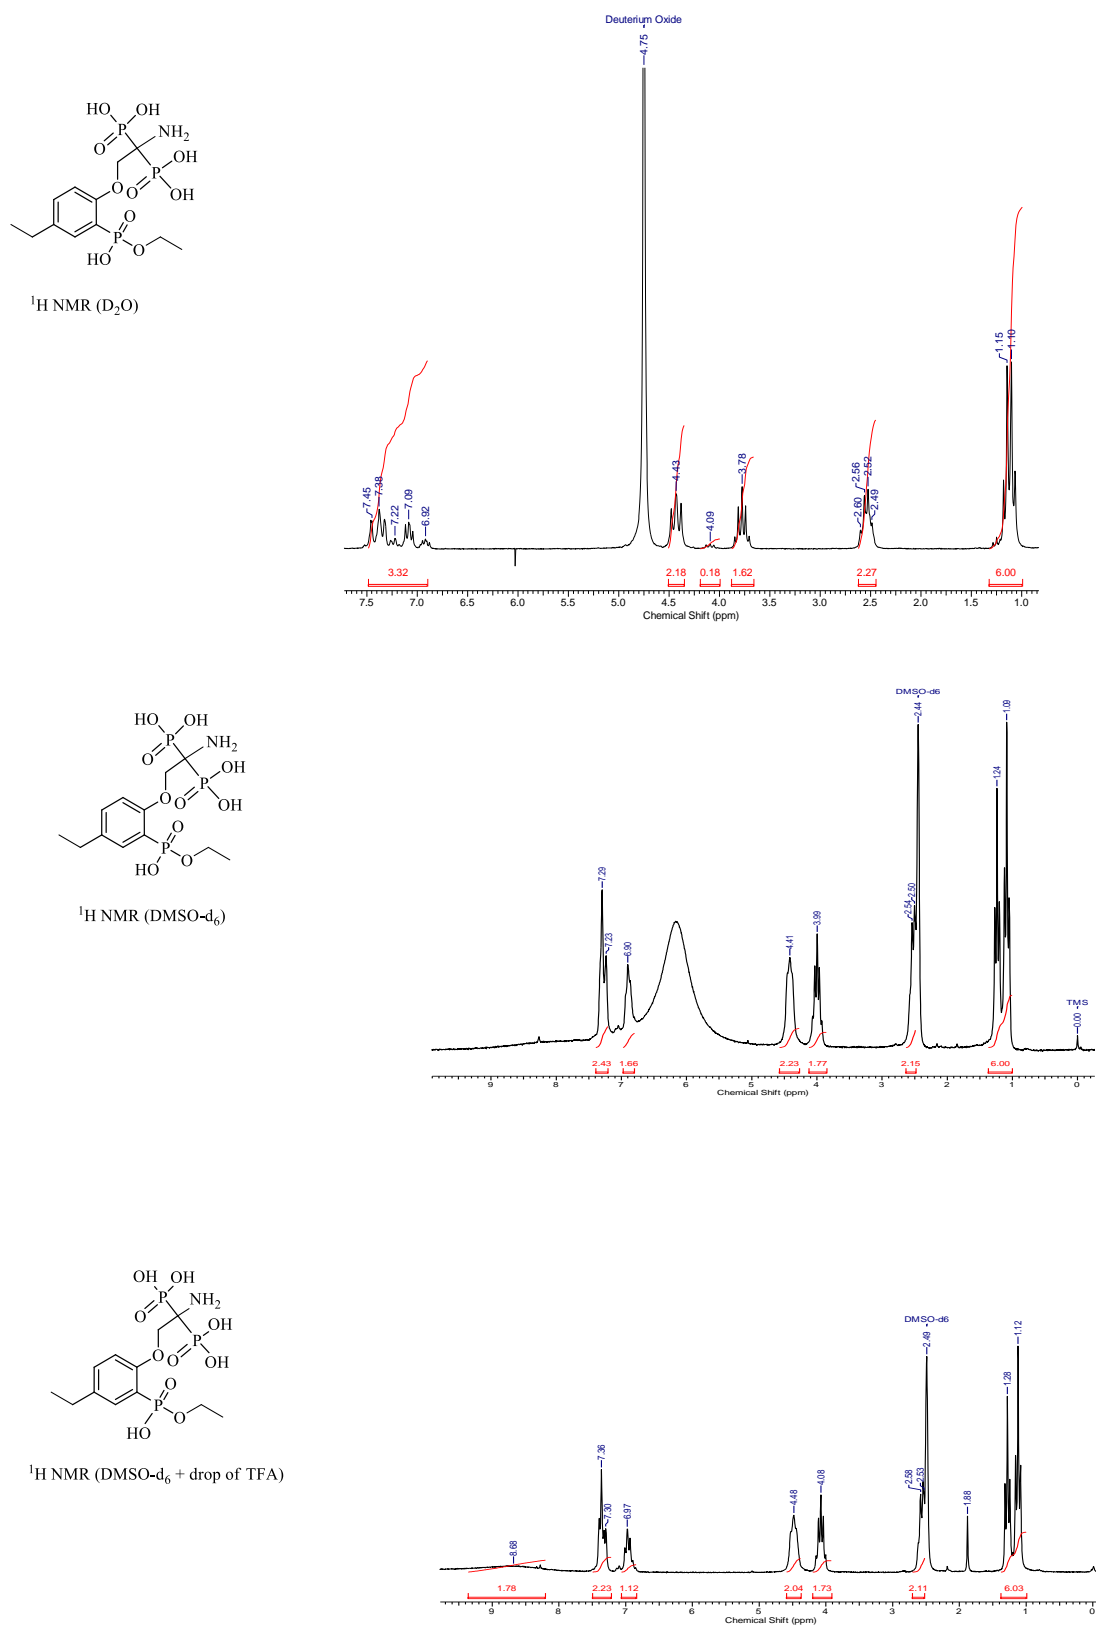

**Figure S4b.**  $^{13}\text{C}$  and  $^{31}\text{P}$  NMR of aminodiphosphonic acid **7b**.

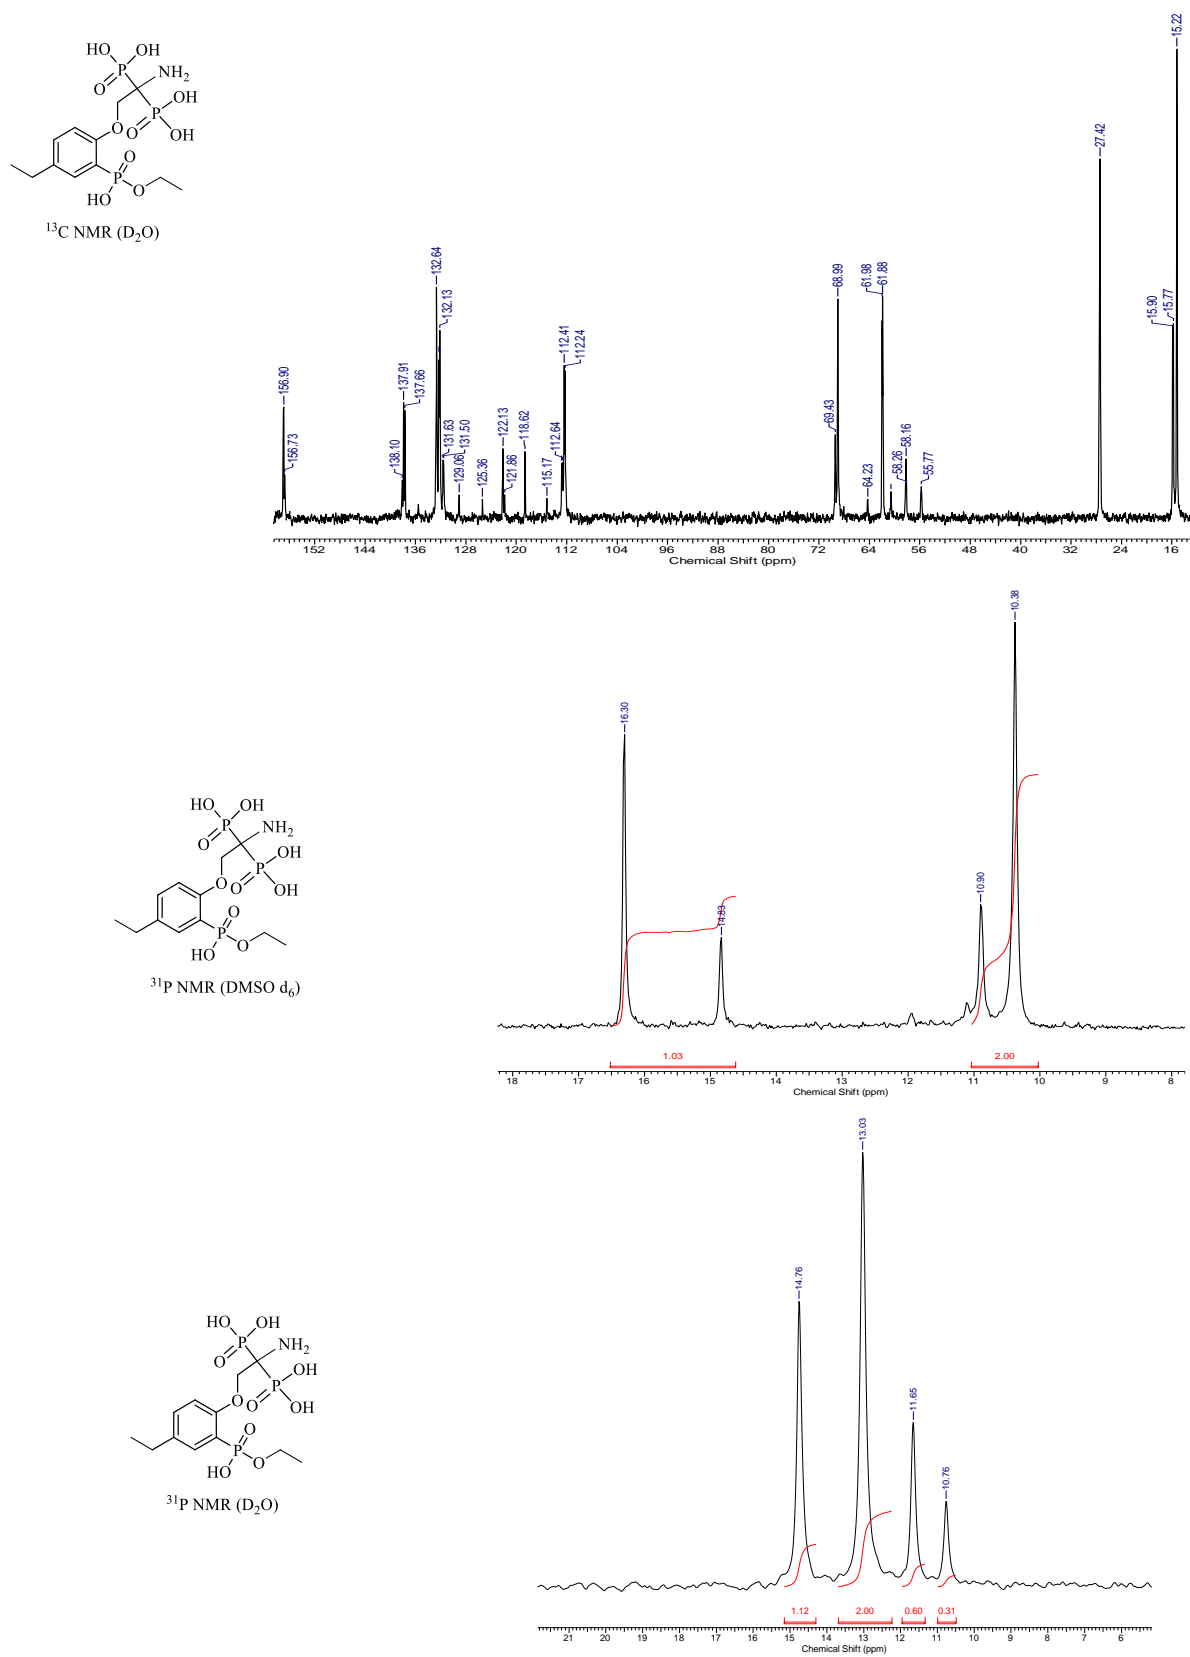

**Figure S5.**  $^1\text{H}$ ,  $^{13}\text{C}$  and  $^{31}\text{P}$  NMR of aminodiphosphonic acid **8**.

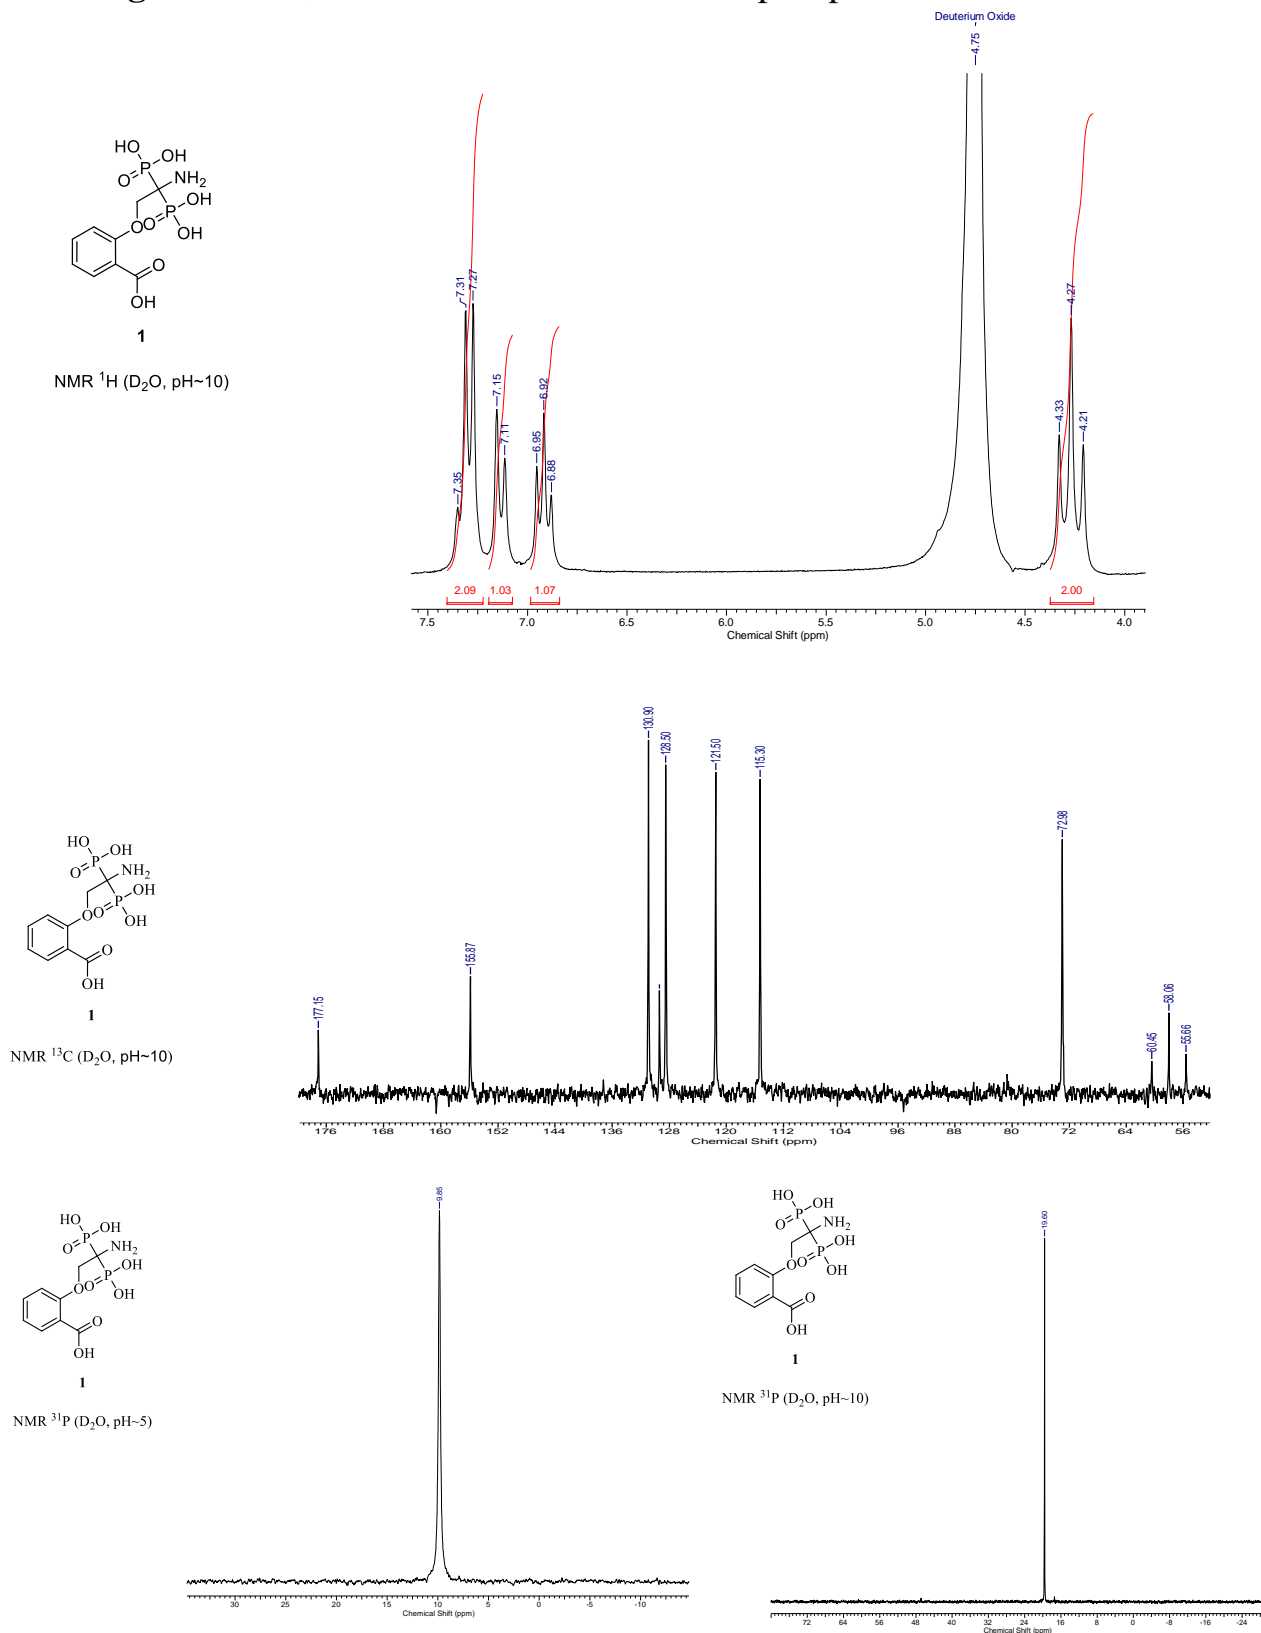

**Figure S6.**  $^1\text{H}$ ,  $^{13}\text{C}$  and  $^{31}\text{P}$  NMR of aminodiphosphonic acid **9**.

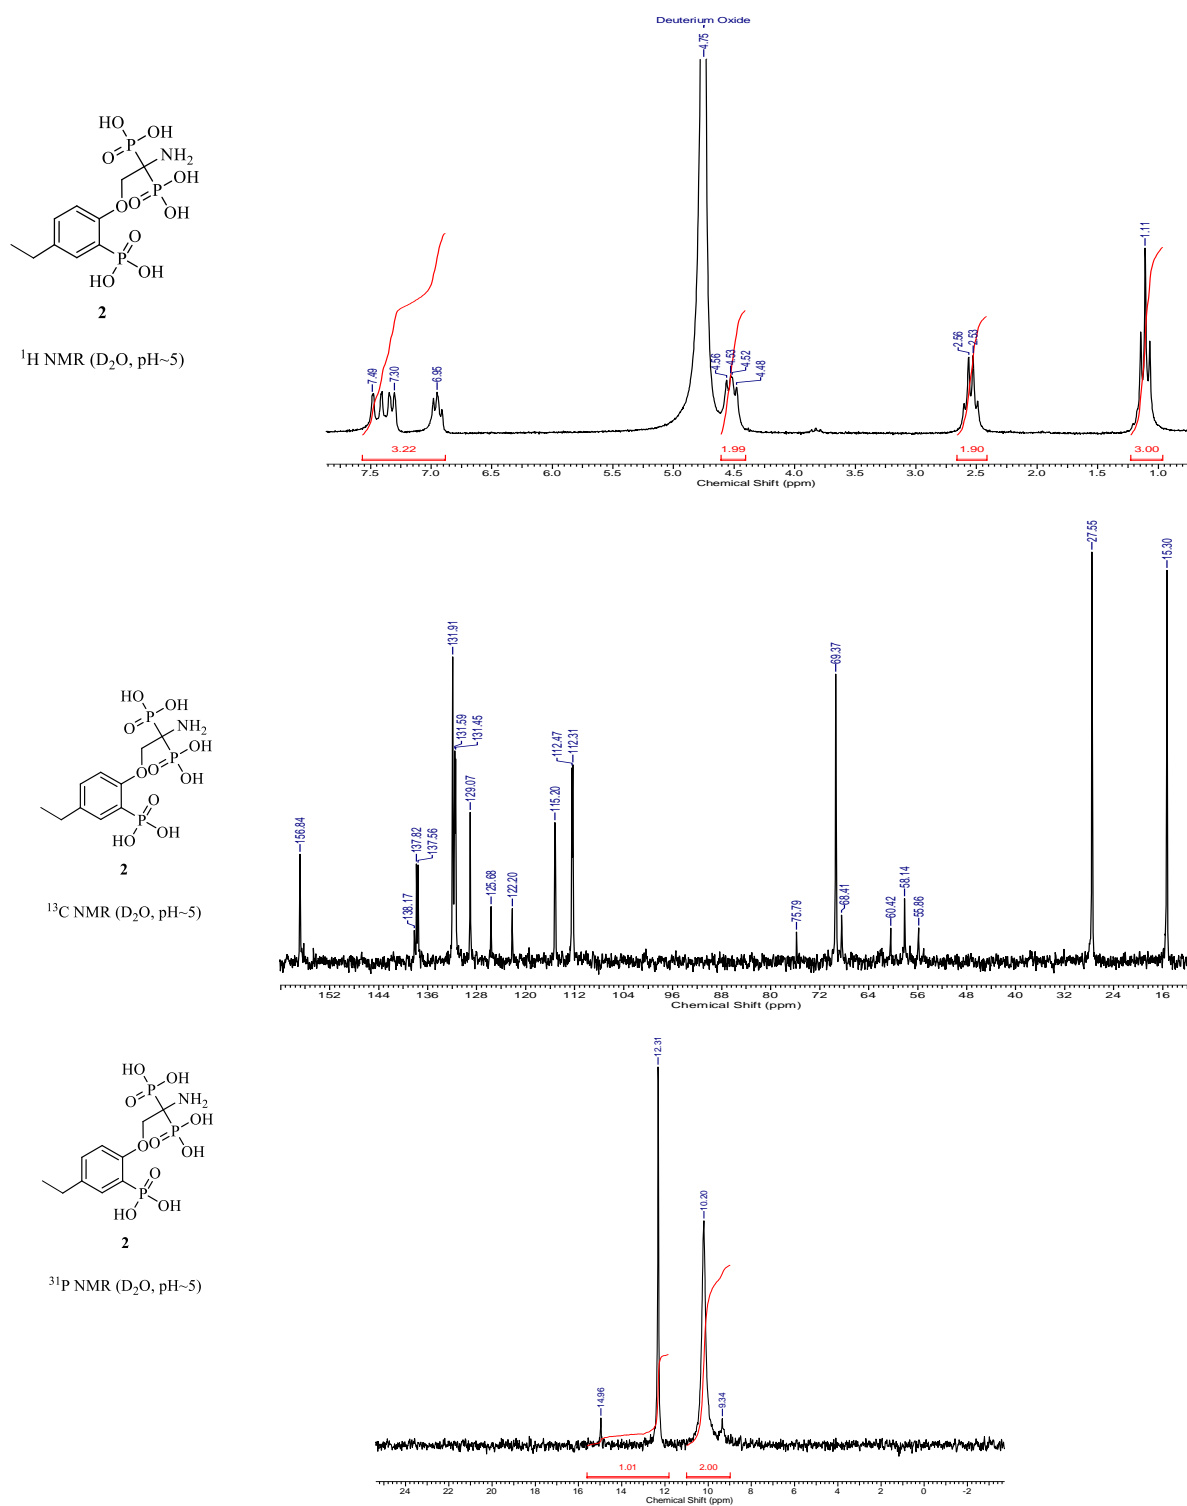

The presence of the second form of acid **9** is likely determined by the syn- or anti-orientation of the methyl group of the ethyl radical and the aminodiphosphonic function in molecule **9**, which is likely why the ratio of conformers, in this case, is ~ 1:10.



**Table S1.** Protonation constants of acids **8** (H<sub>5</sub>L) and **9** (H<sub>6</sub>L) in water at 298 K and ionic strength of  $I = 0.1$  M KCl <sup>a</sup>.

| No. | Equilibrium               | $\log\beta^b$ |              |                    |                   |
|-----|---------------------------|---------------|--------------|--------------------|-------------------|
|     |                           | <b>8</b>      | <b>9</b>     | MAMDP <sup>c</sup> | AEDP <sup>c</sup> |
| 1   | L + H = HL                | 10.88 ± 0.19  | 11.82 ± 0.29 | 13.4               | 11.5              |
| 2   | L + 2H = H <sub>2</sub> L | 19.99 ± 0.18  | 22.47 ± 0.32 | 21.95              | 20.08             |
| 3   | L + 3H = H <sub>3</sub> L | 25.64 ± 0.21  | 32.23 ± 0.32 | 26.81              | 25.45             |
| 4   | L + 4H = H <sub>4</sub> L | 29.10 ± 0.15  | 40.73 ± 0.32 | 27.87              | 26.95             |
| 5   | L + 5H = H <sub>5</sub> L | 32.09 ± 0.28  | 45.78 ± 0.33 |                    |                   |
| 6   | L + 6H = H <sub>6</sub> L | -             | 48.52 ± 0.34 |                    |                   |

<sup>a</sup> For simplicity, the charges of chemical forms in the equilibria are not indicated.

<sup>b</sup>  $\log\beta$  are full equilibrium constants, the errors in the  $\lg\beta$  values are evaluated by error propagation rule for the several titrations and applied algorithm calculations (see Experimental section)

<sup>c</sup> Protonation constants of similar known ligands [22]: (dimethylamino)methylenediphosphonic acid (MAMDP) and (aminoethylene)diphosphonic acid (AEDP), at 297 K and  $I = 0.2$  M.

**Table S2.** Full stability constants of the Ga<sup>3+</sup> complexes with **8** (H<sub>5</sub>L) and **9** (H<sub>6</sub>L) in water at 298 K and ionic strength of  $I = 0.1$  M KCl <sup>a</sup>.

| No. | Equilibrium                      | $\log\beta$  |              |                   |                      |                    |
|-----|----------------------------------|--------------|--------------|-------------------|----------------------|--------------------|
|     |                                  | <b>8</b>     | <b>9</b>     | GDPO <sup>b</sup> | EDDADPO <sup>b</sup> | EDTPO <sup>b</sup> |
| 1   | Ga + L = GaL                     | 26.63 ± 0.24 | 31.92 ± 0.32 | 21.93             | 26.82                | 31.83              |
| 2   | Ga + H + L = GaHL                | 34.91 ± 0.32 | 40.82 ± 0.51 | 26.02             | 31.92                | 38.48              |
| 3   | Ga + 2H + L = GaH <sub>2</sub> L | 39.51 ± 0.29 | 49.10 ± 0.45 | 28.53             | 34.16                | 43.58              |
| 4   | Ga + 3H + L = GaH <sub>3</sub> L | 42.76 ± 0.32 | 57.13 ± 0.46 |                   |                      | 46.87              |
| 5   | Ga + 4H + L = GaH <sub>4</sub> L | -            | ≈ 62         |                   |                      | 49.33              |

<sup>a</sup> See notes for Table S1.

<sup>b</sup> Full stability constants of the Ga<sup>3+</sup> complexes with known multidentate ligands containing two or four phosphonic groups [23]: glycine-*N,N*-bis(methylenephosphonic) acid (GDPO), ethylenediamine-*N,N'*-diacetic-*N,N'*-bis(methylenephosphonic) acid (EDDADPO), and ethylenediamine-*N,N,N',N'*-tetrakis(methylenephosphonic) acid (EDTPO), at 298 K and  $I = 0.1$  M KNO<sub>3</sub>.
